# Supplementary material
Source: MDPI journal article supplement (https://www.mdpi.com/1911-8074/12/2/101)
Supplement: s1 [file s1]

## **SUPPLEMENTARY FILE**

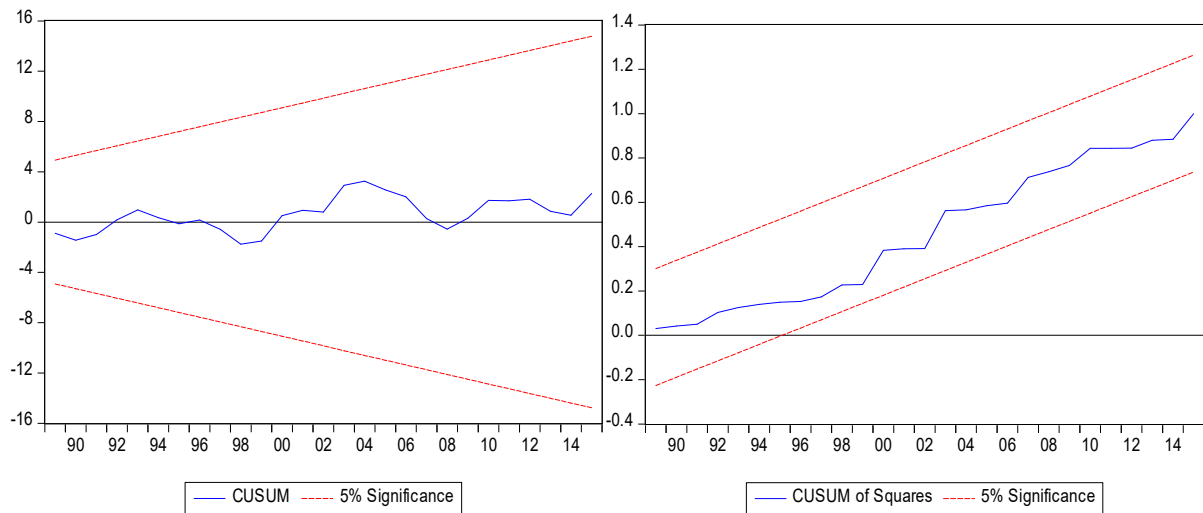

**Figure S1.** Plots of CUSUM and CUSUM of SQUARES (LNREER and fundamentals).

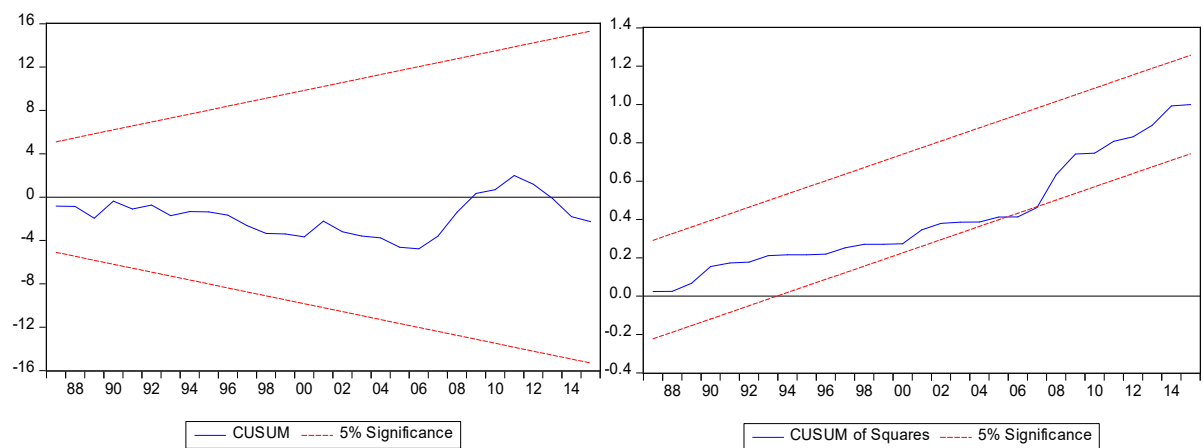

**Figure S2.** Plots of CUSUM and CUSUM of squares (KF, LNOPENNESS, RESERVES).

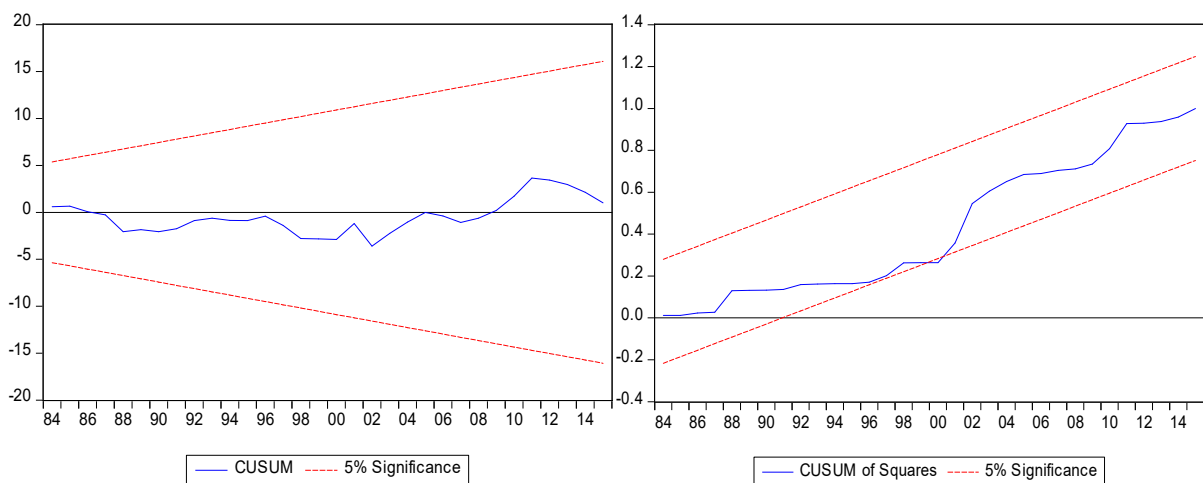

**Figure S3.** Plots of CUSUM and CUSUM of squares (KF, OVER, LNOPENNESS, RESERVES).

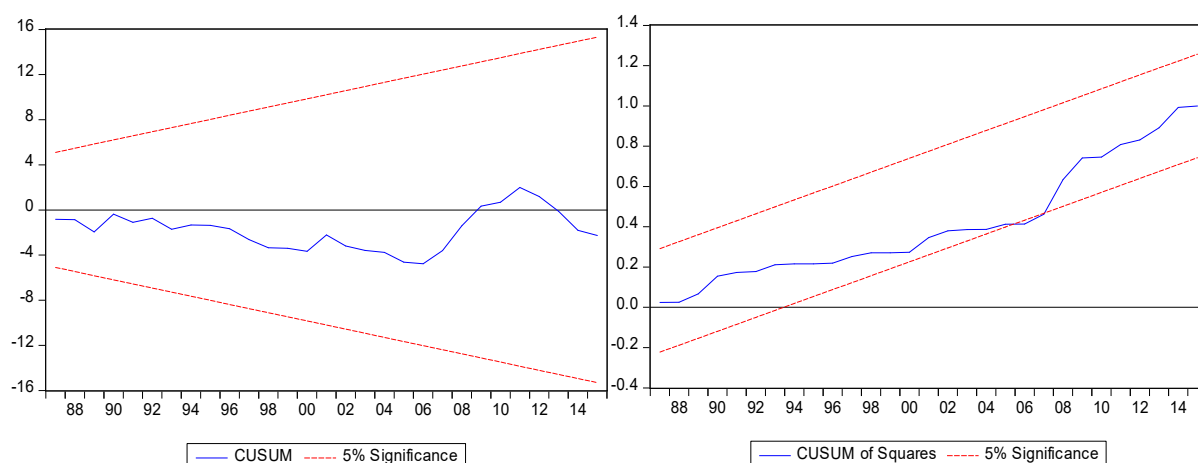

**Figure S4.** Plots of CUSUM and CUSUM of squares (KF, UNDER, LNOPENNESS, RESERVES).

**Table S1.** List of variables and data sources.

| Variables                                                  | Description                                                      | Sources  |
|------------------------------------------------------------|------------------------------------------------------------------|----------|
| Dependent Variables                                        |                                                                  |          |
| LNREER                                                     | Real effective exchange rate index                               | WDI, IFS |
| KF                                                         | Volume of Botswana's outward capital flight (% of GDP)           | WDI      |
| Independent Variables                                      |                                                                  |          |
| LNTOT                                                      | Terms of trade index                                             | WDI      |
| LNGOV                                                      | Government final consumption expenditure (% of GDP)              | WDI      |
| GDP                                                        | Annual percentage growth rate of GDP                             | WDI      |
| FDI                                                        | Foreign direct investment net inflows                            | WDI      |
| AID                                                        | Net official aid received (% of GNI)                             | WDI      |
| LNOPENNESS                                                 | Trade (sum of imports and exports; % of GDP)                     | WDI      |
| LNDEBT                                                     | Total external debt stocks (% of GDP)                            | WDI      |
| LNCAPITAL                                                  | Gross capital formation (% of GDP)                               | WDI      |
| RESERVES                                                   | Reserves and related items (% of GDP)                            | WDI      |
| INF                                                        | Inflation as measured by the consumer price index                | WDI      |
| IRD                                                        | Difference between Botswana & South Africa's real interest rates | WDI      |
| Variables for Determining the Type of Misalignment         |                                                                  |          |
| LNCAC                                                      | Cyclical component of Botswana's current account                 | WDI      |
| LNDEBTC                                                    | Cyclical component of Botswana's stock of external debt          | WDI      |
| LNRGDPC                                                    | Cyclical component of Botswana's real GDP                        | IMF      |
| LNi <sup>US</sup>                                          | Annual yield on the US government medium-term bond               | FRED     |
| EMS                                                        | Excess broad money supply                                        | WDI      |
| Variables for Measuring Capital Flight (not scaled to GDP) |                                                                  |          |
| VKF                                                        | Volume of outward capital flight for Botswana                    | Author   |
| ED                                                         | Total external debt stocks                                       | WDI      |
| FI                                                         | Foreign direct investment net inflows                            | WDI      |
| CAD                                                        | Current account deficit                                          | WDI      |
| FR                                                         | Reserves and related items                                       | WDI      |

Notes:

1.  $VKF_t = \Delta ED_t + FI_t - CAD_t - \Delta FR_t$ .
2. KF was calculated as  $\left(\frac{VKF_t}{GDP_t}\right)\%$  where VKF is the volume of capital flight measured using the residual method and GDP is Botswana's total GDP.
